# Supplementary material for: Selective sensing of citrate by a supramolecular ensemble formed by a phenazine copper(i) complex and a perylene diimide derivative
Source: Royal Society of Chemistry journal article supplement (doi:10.1039/c5nj01694k), 2015-01-01
Supplement: c5nj01694k1.pdf [file c5nj01694k1.pdf]

Electronic Supplementary Material (ESI) for New Journal of Chemistry.

This journal is © The Royal Society of Chemistry and the Centre National de la Recherche Scientifique 2015

## Supplementary Materials

### **Selective sensing of citrate by supramolecular ensemble formed by phenazine copper(I) complex and perylene diimide derivative**

Yunyan Gao,<sup>a</sup> Gan Huang,<sup>a</sup> Zhize Ou,<sup>a\*</sup> Zichao Wang,<sup>a</sup> Baolong Ju,<sup>a</sup> Yi Li,<sup>b</sup> Xuesong Wang,<sup>b</sup> Shiwei Yin<sup>\*c</sup>

<sup>a</sup>The Key Laboratory of Space Applied Physics and Chemistry, Ministry of Education, Department of Applied Chemistry, School of Science, Northwestern Polytechnical University, Xi'an, 710072, People's Republic of China; E-Mail: ouzhize@nwpu.edu.cn; Fax&Tel: +86-29-88431677.

<sup>b</sup>Technical Institute of Physics and Chemistry, Chinese Academy of Sciences, Beijing, 100190, People's Republic of China

<sup>c</sup>Key Laboratory for Macromolecular Science of Shaanxi Province, School of Chemistry & Chemical Engineering, Shaanxi Normal University, Xi'an City, People's Republic of China, 710062; E-mail: yin\_sw@snnu.edu.cn.

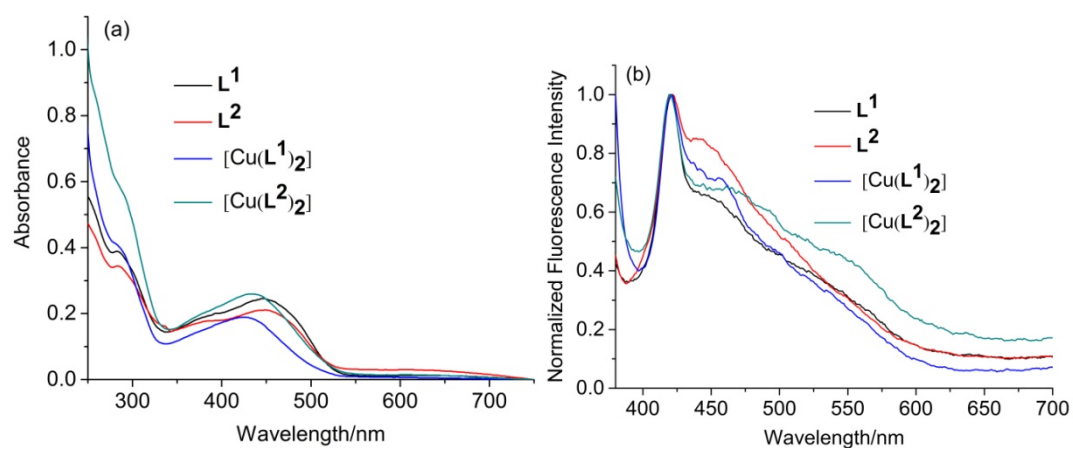

**Fig. S1.** (a) Absorption and (b) normalized fluorescence emission spectra of **L<sup>1</sup>**, **L<sup>2</sup>**, **[Cu(L<sup>1</sup>)<sub>2</sub>]** and **[Cu(L<sup>2</sup>)<sub>2</sub>]** in Tris-HCl (10 mM, pH 7.4) ( $\lambda_{\text{ex}} = 365 \text{ nm}$ ). The concentration for **L<sup>1</sup>**, **L<sup>2</sup>**, **[Cu(L<sup>1</sup>)<sub>2</sub>]** or **[Cu(L<sup>2</sup>)<sub>2</sub>]** is 20  $\mu\text{M}$ .

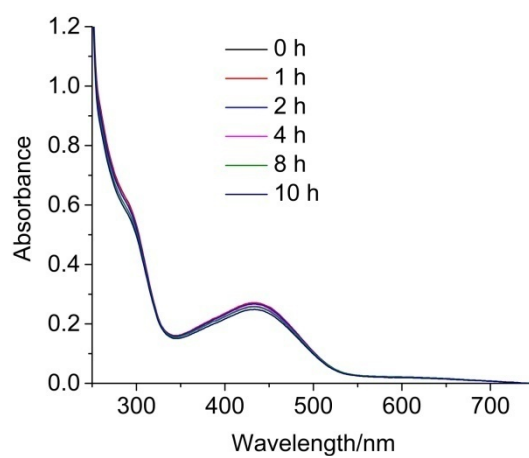

**Fig. S2** UV-vis absorption spectral changes of **[Cu(L<sup>2</sup>)<sub>2</sub>]** (20  $\mu\text{M}$ ) in Tris-HCl buffer (10 mM, pH 7.4) incubated in air and under indoor light.

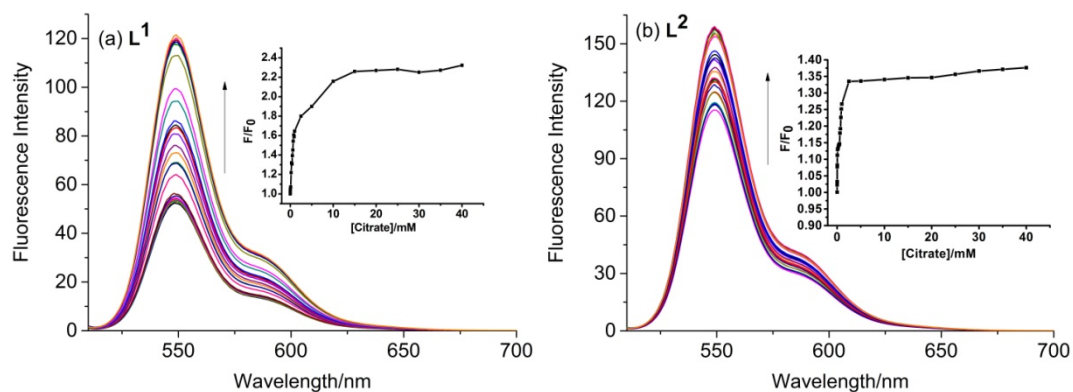

**Fig. S3** Changes in fluorescence emission spectra of PASP ( $4\ \mu\text{M}$ ) in Tris-HCl buffer in the presence of (a)  $\text{L}^1$  ( $36\ \mu\text{M}$ ) and (b)  $\text{L}^2$  ( $16\ \mu\text{M}$ ) upon addition of citrate. [citrate] = 0, 0.0025, 0.005, 0.01, 0.02, 0.03, 0.05, 0.1, 0.2, 0.3, 0.4, 0.5, 0.6, 0.7, 0.8, 0.9, 1.0, 2.5, 5.0, 10, 15, 20, 25, 30, 35, 40 mM.

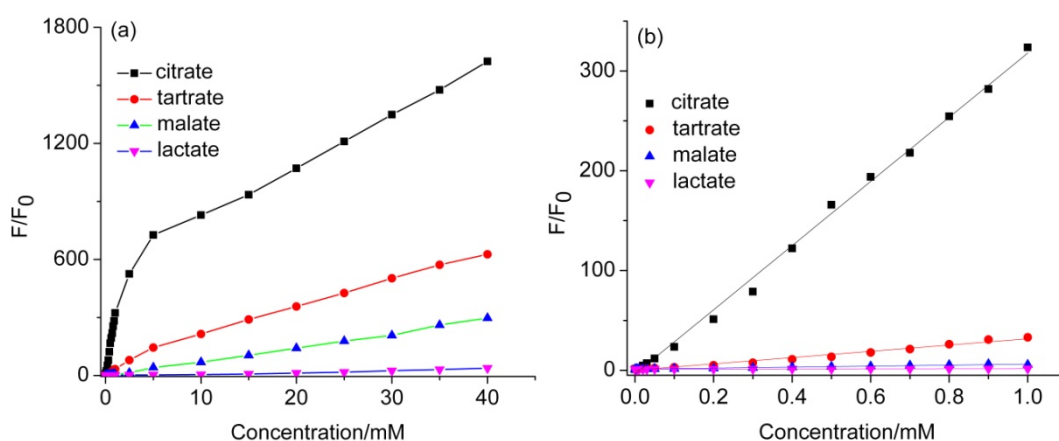

**Fig. S4** Relative fluorescence intensity ( $F/F_0$ ) of PASP ( $4\ \mu\text{M}$ ) in the presence of  $[\text{Cu}(\text{L}^1)_2]$  ( $18\ \mu\text{M}$ ) plotted as a function of  $\alpha$ -hydroxycarboxylates concentration. Concentration ranges in (a) 0–40 mM and (b) 0–1 mM.
